# Supplementary material
Source: HighWire-hosted journal article supplement (http://jpet.aspetjournals.org/highwire/filestream/147759/field_highwire_adjunct_files/0/264127SupplData.pdf)
Supplement: 264127SupplData.pdf [file 264127SupplData.pdf]

**Supplemental data**

**Dual-Modified Liposome for Targeted and Enhanced Gene Delivery into Mice Brain**

Bruna dos Santos Rodrigues, Sushant Lakkadwala, Takahisa Kanekiyo and Jagdish Singh

**Supplemental Table 1:** Participle size and encapsulation efficiency of kFGFTf-liposomes (380 nM phospholipid) containing different amount of pDNA-chitosan complexes

| <b>Characterization of liposomes</b> | <b>kFGFTf-liposomes</b>                                        |                                                                 |
|--------------------------------------|----------------------------------------------------------------|-----------------------------------------------------------------|
|                                      | 380 nM phospholipid + 25 µg pDNA complexed to chitosan (N/P=5) | 380 nM phospholipid + 500 µg pDNA complexed to chitosan (N/P=5) |
| Particle size                        | 153.1±3.72                                                     | 154.3±1.35                                                      |
| Encapsulation Efficiency             | 91.3±5.54%                                                     | 89.5±0,91%                                                      |

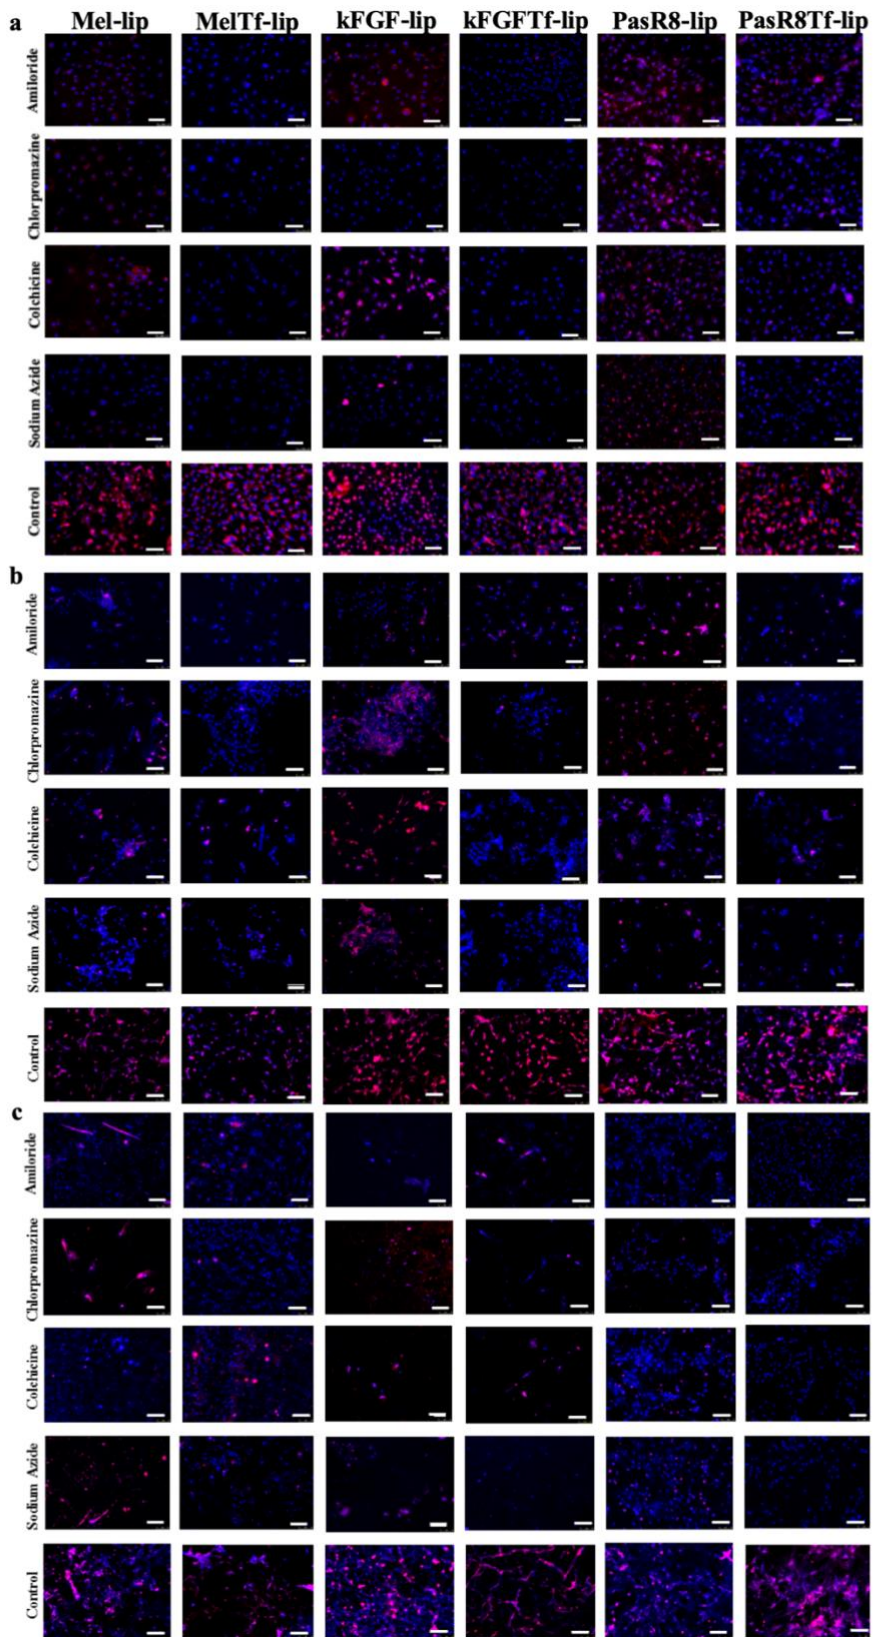

**Supplemental Figure 1.** Fluorescence microscopy images indicating the effect on uptake of Mel-lip, MelTf-lip, kFGF-lip, kFGFTf-lip, PasR8-lip and PasR8Tf-liposomes after 4 h of incubation in bEnd.3 (a), primary astrocytes (b) and primary neuronal cells (c) pretreated with endocytosis inhibitors (amiloride, chlorpromazine, colchicine and sodium azide) (Scale bar depicts 100  $\mu$ m).

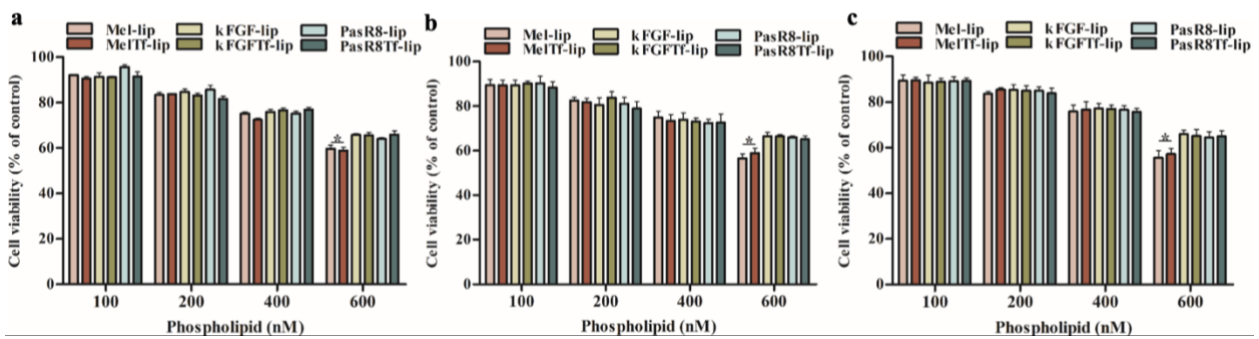

**Supplemental Figure 2.**  $\beta$ -galactosidase activity induced in bEnd.3 (a), primary astrocytes (b) and primary neuronal cells (c) after 48 h of treatment with Mel-lip, MelTf-lip, kFGF-lip, kFGFTf-lip, PasR8-lip and PasR8Tf -liposomes containing chitosan- $\beta$ gal complexes as determined by  $\beta$ gal assay kit. Data are expressed as mean  $\pm$  SD (n=4). Statistically significant ( $p < 0.05$ ) differences are shown as (\*) with control, (#) with Lipofectamine 3000 and (†) with Mel-lip, kFGF-lip and PasR8-liposomes.

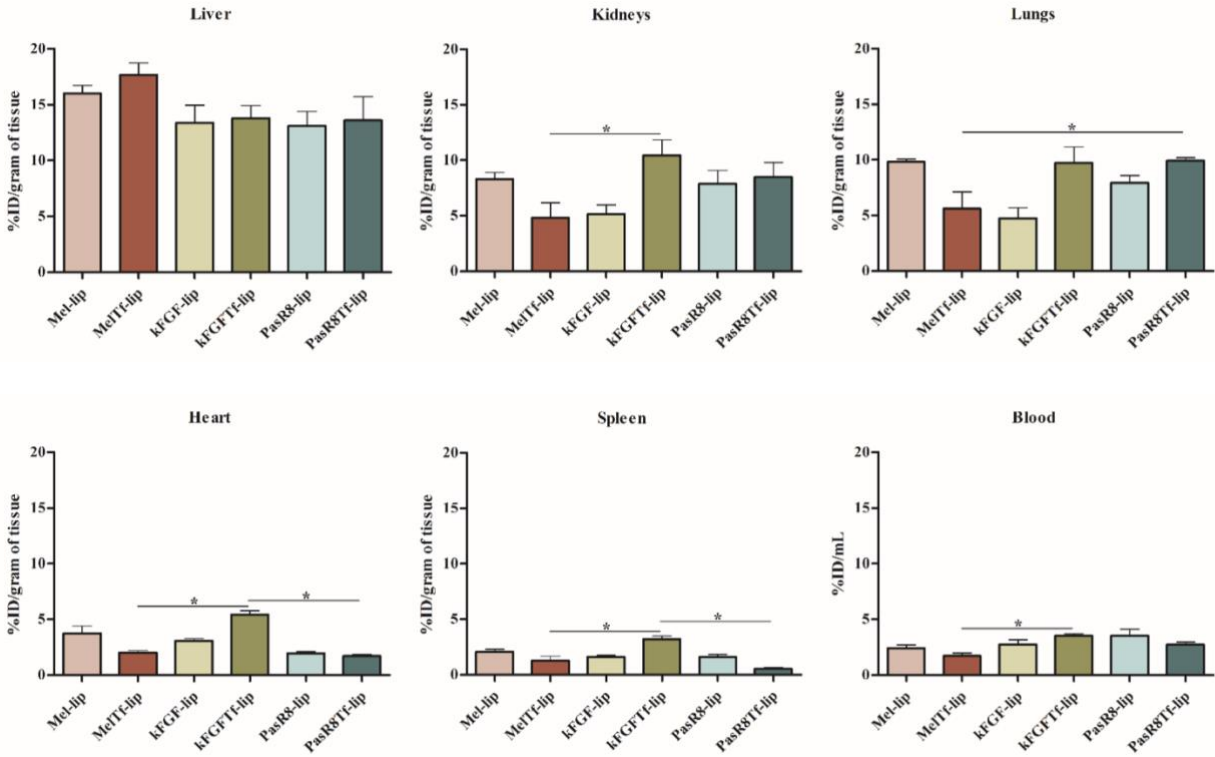

**Supplemental Figure 3.** *In vivo* biodistribution of Mel-lip, MelTf-lip, kFGF-, kFGFTf-, PasR8- and PasR8Tf-liposomes in liver, kidneys, heart, lungs, spleen and blood of CB57BL/6J mice after 24 h of liposomal administration. Data are expressed as mean  $\pm$  SE (n=6). Statistically significant ( $p < 0.05$ ) differences are shown as (\*).

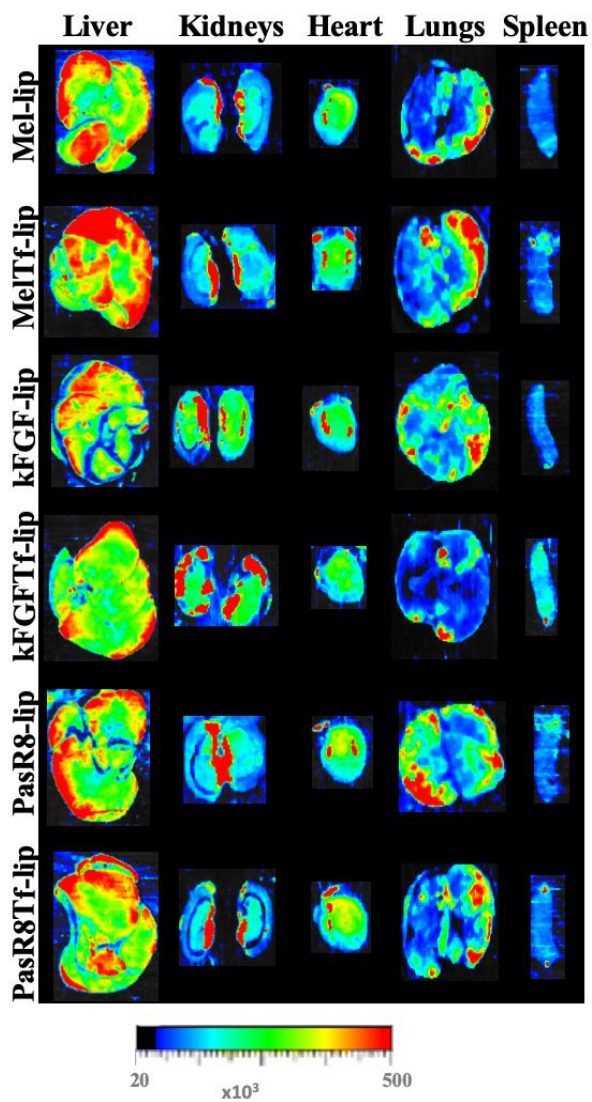

**Supplemental Figure 4.** Near-Infrared (NIR) imaging of relative fluorescence intensity in liver, kidneys, heart, lungs and spleen from C57BL/6J mice 24 h after administration of Mel-lip, MelTf-lip, kFGF-lip, kFGFTf-lip, PasR8-lip and PasR8Tf-liposomes.
